# Supplementary material for: Polycyclic Aromatic Hydrocarbons in Soil at Different Depths under a Long-Term Experiment Depending on Fertilization
Source: MDPI journal article supplement (doi:10.3390/ijerph191610460), 2022-08-22
Supplement: s1 [file s1]

# Supplementary Materials

Table S1. Design of the field trial.

| Series with FYM   |                |                                           | Series without FYM |                |                                           |
|-------------------|----------------|-------------------------------------------|--------------------|----------------|-------------------------------------------|
| Block<br>(repeat) | Plot<br>number | Mineral<br>fertilisation<br>(SM – Tab. 2) | Block<br>(repeat)  | Plot<br>number | Mineral<br>fertilisation<br>(SM – Tab. 2) |
| I                 | 1              | 3                                         | I                  | 48             | 4                                         |
|                   | 2              | 7                                         |                    | 47             | 6                                         |
|                   | 3              | 4                                         |                    | 46             | 3                                         |
|                   | 4              | 1                                         |                    | 45             | 5                                         |
|                   | 5              | 8                                         |                    | 44             | 1                                         |
|                   | 6              | 2                                         |                    | 43             | 2                                         |
|                   | 7              | 6                                         |                    | 42             | 8                                         |
|                   | 8              | 5                                         |                    | 41             | 7                                         |
| II                | 9              | 4                                         | II                 | 40             | 5                                         |
|                   | 10             | 6                                         |                    | 39             | 8                                         |
|                   | 11             | 7                                         |                    | 38             | 6                                         |
|                   | 12             | 1                                         |                    | 37             | 3                                         |
|                   | 13             | 8                                         |                    | 36             | 7                                         |
|                   | 14             | 2                                         |                    | 35             | 2                                         |
|                   | 15             | 3                                         |                    | 34             | 4                                         |
|                   | 16             | 5                                         |                    | 33             | 1                                         |
| III               | 17             | 1                                         | III                | 32             | 8                                         |
|                   | 18             | 7                                         |                    | 31             | 5                                         |
|                   | 19             | 8                                         |                    | 30             | 7                                         |
|                   | 20             | 2                                         |                    | 29             | 4                                         |
|                   | 21             | 4                                         |                    | 28             | 1                                         |
|                   | 22             | 6                                         |                    | 27             | 5                                         |
|                   | 23             | 3                                         |                    | 26             | 2                                         |
|                   | 24             | 5                                         |                    | 25             | 6                                         |

Table S2. Mineral fertilisation regime.

| No | Variant                                           | Sugar beet                  |    |     |      | Spring barley |      | Maize        |      | Spring wheat* |       |             |       |      |
|----|---------------------------------------------------|-----------------------------|----|-----|------|---------------|------|--------------|------|---------------|-------|-------------|-------|------|
|    |                                                   | N                           |    |     |      | P             |      | K            |      | Mg            |       |             |       |      |
|    |                                                   | Dose [kg ha <sup>-1</sup> ] |    |     |      |               |      |              |      |               |       |             |       |      |
| 1  | N <sub>0</sub> P <sub>0</sub> K <sub>0</sub>      | <u>0</u>                    | 0  | 0   | 0*   | <u>0*</u>     | 0    | <u>0</u>     | 0    | 0             | 0*    | <u>0</u>    | 0*    | 0    |
| 2  | N <sub>1</sub> P <sub>1</sub> K <sub>1</sub>      | <u>60</u>                   | 30 | 60  | 40*  | <u>34.9*</u>  | 26.2 | <u>66.4</u>  | 33.2 | 49.8          | 24.9* | <u>0</u>    | 0*    | 0    |
| 3  | N <sub>2</sub> P <sub>1</sub> K <sub>1</sub>      | <u>120</u>                  | 60 | 120 | 80*  | <u>34.9*</u>  | 26.2 | <u>66.4</u>  | 33.2 | 49.8          | 24.9* | <u>0</u>    | 0*    | 0    |
| 4  | N <sub>3</sub> P <sub>1</sub> K <sub>1</sub>      | <u>180</u>                  | 90 | 180 | 120* | <u>34.9*</u>  | 26.2 | <u>66.4</u>  | 33.2 | 49.8          | 24.9* | <u>0</u>    | 0*    | 0    |
| 5  | N <sub>2</sub> P <sub>1</sub> K <sub>2</sub>      | <u>120</u>                  | 60 | 120 | 80*  | <u>34.9*</u>  | 26.2 | <u>132.8</u> | 66.4 | 99.7          | 49.8* | <u>0</u>    | 0*    | 0    |
| 6  | N <sub>2</sub> P <sub>1</sub> K <sub>3</sub>      | <u>120</u>                  | 60 | 120 | 80*  | <u>34.9*</u>  | 26.2 | <u>199.3</u> | 99.7 | 149.7         | 74.7* | <u>0</u>    | 0*    | 0    |
| 7  | N <sub>2</sub> P <sub>1</sub> K <sub>2</sub> Mg   | <u>120</u>                  | 60 | 120 | 80*  | <u>34.9*</u>  | 26.2 | <u>132.8</u> | 66.4 | 99.7          | 49.8* | <u>48.2</u> | 18.1* | 24.1 |
| 8  | N <sub>2</sub> P <sub>1</sub> K <sub>2</sub> MgCa | <u>120</u>                  | 60 | 120 | 80*  | <u>34.9*</u>  | 26.2 | <u>132.8</u> | 66.4 | 99.7          | 49.8* | <u>48.2</u> | 18.1* | 24.1 |

Table S3. Mean and standard deviation of PAHs 16 content in  $\mu\text{g kg}^{-1}$  depending on soil horizon  
0-30cm and 30-60 cm in long-term fertilizer experiment

| PAHs                   | Soil horizons |                                |               |                               |
|------------------------|---------------|--------------------------------|---------------|-------------------------------|
|                        | 0-30 cm       |                                | 30-60 cm      |                               |
|                        | mean          | $\pm\text{SD}$                 | men           | $\pm\text{SD}$                |
| Naphtalene             | 0.53          | $\pm 0.60$                     | 0.63          | $\pm 1.24$                    |
| Acenaphthylene         | 3.95          | $\pm 8.59$                     | 1.00          | $\pm 1.58$                    |
| Acenaphthene           | 1.70          | $\pm 4.72$                     | 0.46          | $\pm 0.55$                    |
| Fluorene               | 0.20          | $\pm 0.49$                     | 0.16          | $\pm 0.09$                    |
| Phenanthrene           | 15.55         | $\pm 19.91$                    | 4.75          | $\pm 6.74$                    |
| Anthracene             | 1.42          | $\pm 2.88$                     | 0.82          | $\pm 1.44$                    |
| Fluoranthene           | 12.72         | $\pm 14.44$                    | 28.16         | $\pm 26.87$                   |
| Pyrene                 | 9.77          | $\pm 16.65$                    | 17.40         | $\pm 19.89$                   |
| Benz(a)anthracene      | 16.62         | $\pm 24.22$                    | 7.98          | $\pm 14.81$                   |
| Chrysene               | 7.63          | $\pm 7.55$                     | 14.8          | $\pm 21.18$                   |
| Benzo(b)fluoranthene   | 37.61         | $\pm 34.62$                    | 13.20         | $\pm 16.80$                   |
| Benzo(k)fluoranthene   | 7.14          | $\pm 13.30$                    | 11.23         | $\pm 16.15$                   |
| Benzo(a)pyrene         | 23.78         | $\pm 29.21$                    | 0.73          | $\pm 1.35$                    |
| Ideno(1,2,3-cd)pyrene  | 8.81          | $\pm 7.31$                     | 2.28          | $\pm 4.23$                    |
| Dibenzo(a,h)anthracene | 29.63         | $\pm 25.54$                    | 19.77         | $\pm 24.11$                   |
| Benzo(g,h,i)perylene   | 20.97         | $\pm 27.01$                    | 4.65          | $\pm 9.04$                    |
| <b>Sum of 16 PAHs</b>  | <b>198.04</b> | <b><math>\pm 103.43</math></b> | <b>128.02</b> | <b><math>\pm 89.60</math></b> |
| Sum of 2-rings         | 0.53          | $\pm 0.60$                     | 0.63          | $\pm 1.24$                    |
| Sum of 3-rings         | 4.56          | $\pm 5.56$                     | 1.44          | $\pm 1.46$                    |
| Sum of 4-rings         | 10.04         | $\pm 10.38$                    | 20.12         | $\pm 19.10$                   |
| Sum of 5-rings         | 22.95         | $\pm 14.49$                    | 10.58         | $\pm 8.83$                    |
| Sum of 6-rings         | 14.90         | $\pm 15.02$                    | 3.46          | $\pm 5.37$                    |
